# Supplementary material for: A tissue-mimetic nano-fibrillar hybrid injectable hydrogel for potential soft tissue engineering applications
Source: PubMed Central journal article supplement (PMC5773686; doi:10.1038/s41598-017-18523-3), 2018-01-18
Supplement: 41598_2017_18523_MOESM1_ESM.pdf [file 41598_2017_18523_MOESM1_ESM.pdf]

Supplementary materials for:  
A tissue-mimetic nano-fibrillar hybrid injectable hydrogel for potential soft tissue engineering applications

Neda Latifi,<sup>1</sup> Meisam Asgari,<sup>1</sup> Hojatollah Vali,<sup>2</sup> and Luc Mongeau<sup>1</sup>

<sup>1</sup>Department of Mechanical Engineering, McGill University,  
817 Sherbrooke street west, Montreal, QC H3A 0C3, Canada

<sup>2</sup>Department of Anatomy & Cell Biology, McGill University,  
3640 University street, Montreal, QC H3A 2B2, Canada

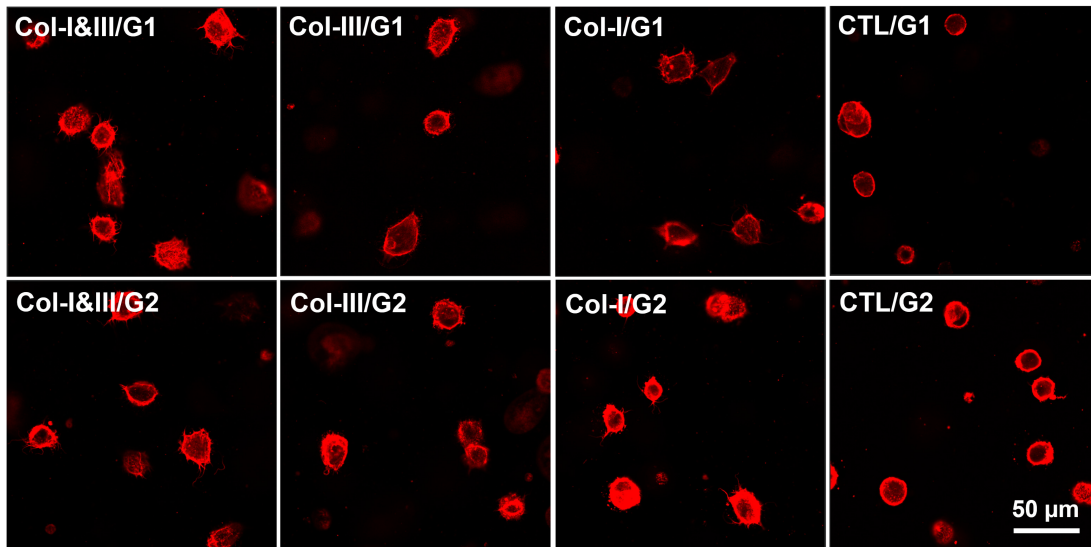

FIG. A.1: Representative fluorescent images of encapsulated cells in the collagen (Col)/glycol-chitosan (GCS) hydrogels and negative controls after 2 days in culture. The cells had a rounded shape at the initial time (not shown here). The cells encapsulated within the Col/GCS hydrogels started to form actin stress fibers at day 2, compared with those in the negative controls with a completely rounded morphology. It was inferred that the cells started to attach and grow in the Col/GCS hydrogels.

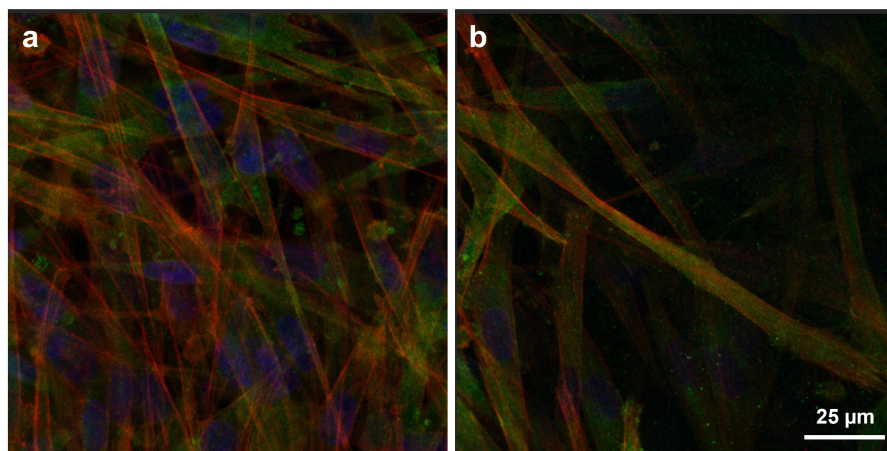

FIG. A.2: Representative fluorescent images of adherent cells cultured on the surface of Col-I&III/GCS hydrogels. (a) The top layer of the cells; (b) The bottom layer of the cells towards the bottom of the well. The two slides were about 60  $\mu\text{m}$  apart in the z- direction. Focal contacts in cells, actin cytoskeleton and nuclei are shown in green, red and blue, respectively. The images were captured with a 63x oil objective, and the scale bar shows 25  $\mu\text{m}$  (Col-III: collagen type III, Col-I: collagen type I, and Col-I&III: both Col-I and Col-III).

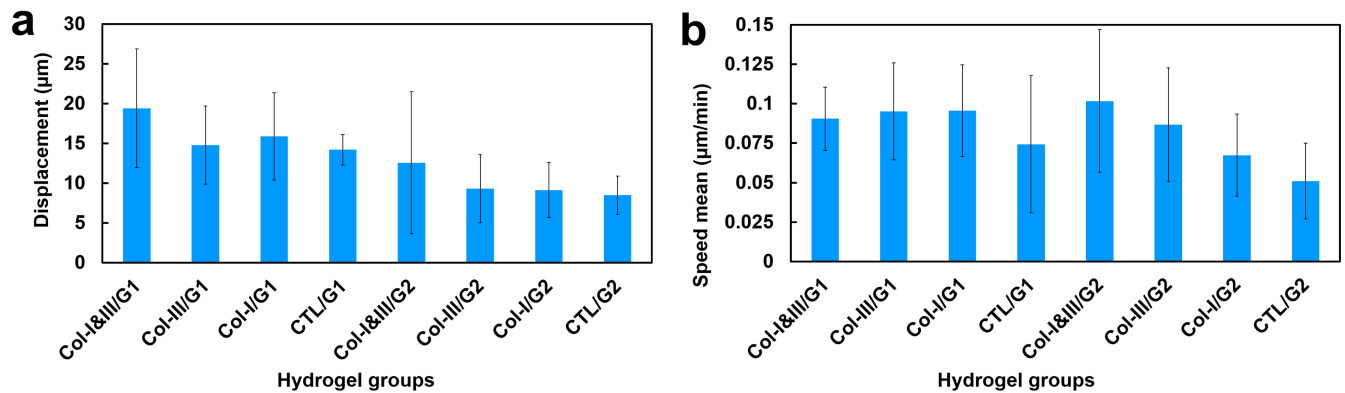

FIG. A.3: Cell migration results. (a) The overall displacement; and (b) the mean speed of the cells encapsulated in the hybrid hydrogels and the negative controls over a duration of 12 hours.

| Group ID                    | Fibril diameter (nm) | Diameter range (nm) |
|-----------------------------|----------------------|---------------------|
| Col-I&III/G1                | 119.1 ± 40.0         | 51–243              |
| Col-III/G1                  | 101.2 ± 30.7         | 46–210              |
| Col-I/G1 (Positive control) | 220.7 ± 66.9         | 110–424             |
| Col-I&III/G2                | 181.4 ± 65.1         | 74–361              |
| Col-III/G2                  | 111.2 ± 37.1         | 54–274              |
| Col-I/G2 (Positive control) | 182.6 ± 57.1         | 96–399              |

TABLE A.1: Collagen fibril diameters (nm) obtained from the atomic force microscopy (AFM) images. Fibril diameters (mean ± standard deviation) and the diameter ranges are listed (Col-I: collagen type I, Col-III: collagen type III and Col-I&III: the simultaneous presence of Col-I and Col-III; G1 and G2 represent 2% and 1% final glycol-chitosan concentration, respectively.).

| Group ID                    | Pore size (μm) | Pore size range (μm) | Total porosity (%) |
|-----------------------------|----------------|----------------------|--------------------|
| Col-I&III/G1                | 45.6 ± 25.5    | 8.0–144.8            | 95.6 ± 0.7         |
| Col-III/G1                  | 51.8 ± 34.3    | 13.0–185.3           | 94.1 ± 0.8         |
| Col-I/G1 (Positive control) | 42.4 ± 25.4    | 9.8–148.1            | 95.3 ± 0.7         |
| CTL/G1 (Negative control)   | 9.7 ± 5.9      | 3.4–40.8             | 87.2 ± 1.5         |
| Col-I&III/G2                | 73.7 ± 39.8    | 18.8–229.7           | 95.8 ± 0.6         |
| Col-III/G2                  | 56.3 ± 35.1    | 10.0–235.9           | 98.4 ± 0.4         |
| Col-I/G2 (Positive control) | 38.7 ± 16.7    | 10.3–86.4            | 94.5 ± 0.7         |
| CTL/G2 (Negative control)   | 14.4 ± 8.3     | 4.1–51.3             | 90.0 ± 0.9         |

TABLE A.2: Pore size of the hydrogels (μm) obtained from the environmental scanning electron microscopy images. Pore size (mean ± standard deviation) and the size ranges are listed (Col-I: collagen type I, Col-III: collagen type III and Col-I&III: the simultaneous presence of Col-I and Col-III; G1 and G2 represent 2% and 1% final glycol-chitosan concentration, respectively.). Micro-computed tomography data showed a total porosity of greater than 90% for all the collagen/glycol-chitosan hydrogels, which was previously reported to provide appropriate diffusive transport within a cell-seeded scaffold *in vitro*.
